# Supplementary material
Source: MDPI journal article supplement (https://www.mdpi.com/2075-163X/12/10/1325)
Supplement: s1 [file s1]

# **Supplementary S1**

## **Photo tables of studied palynomorphs**

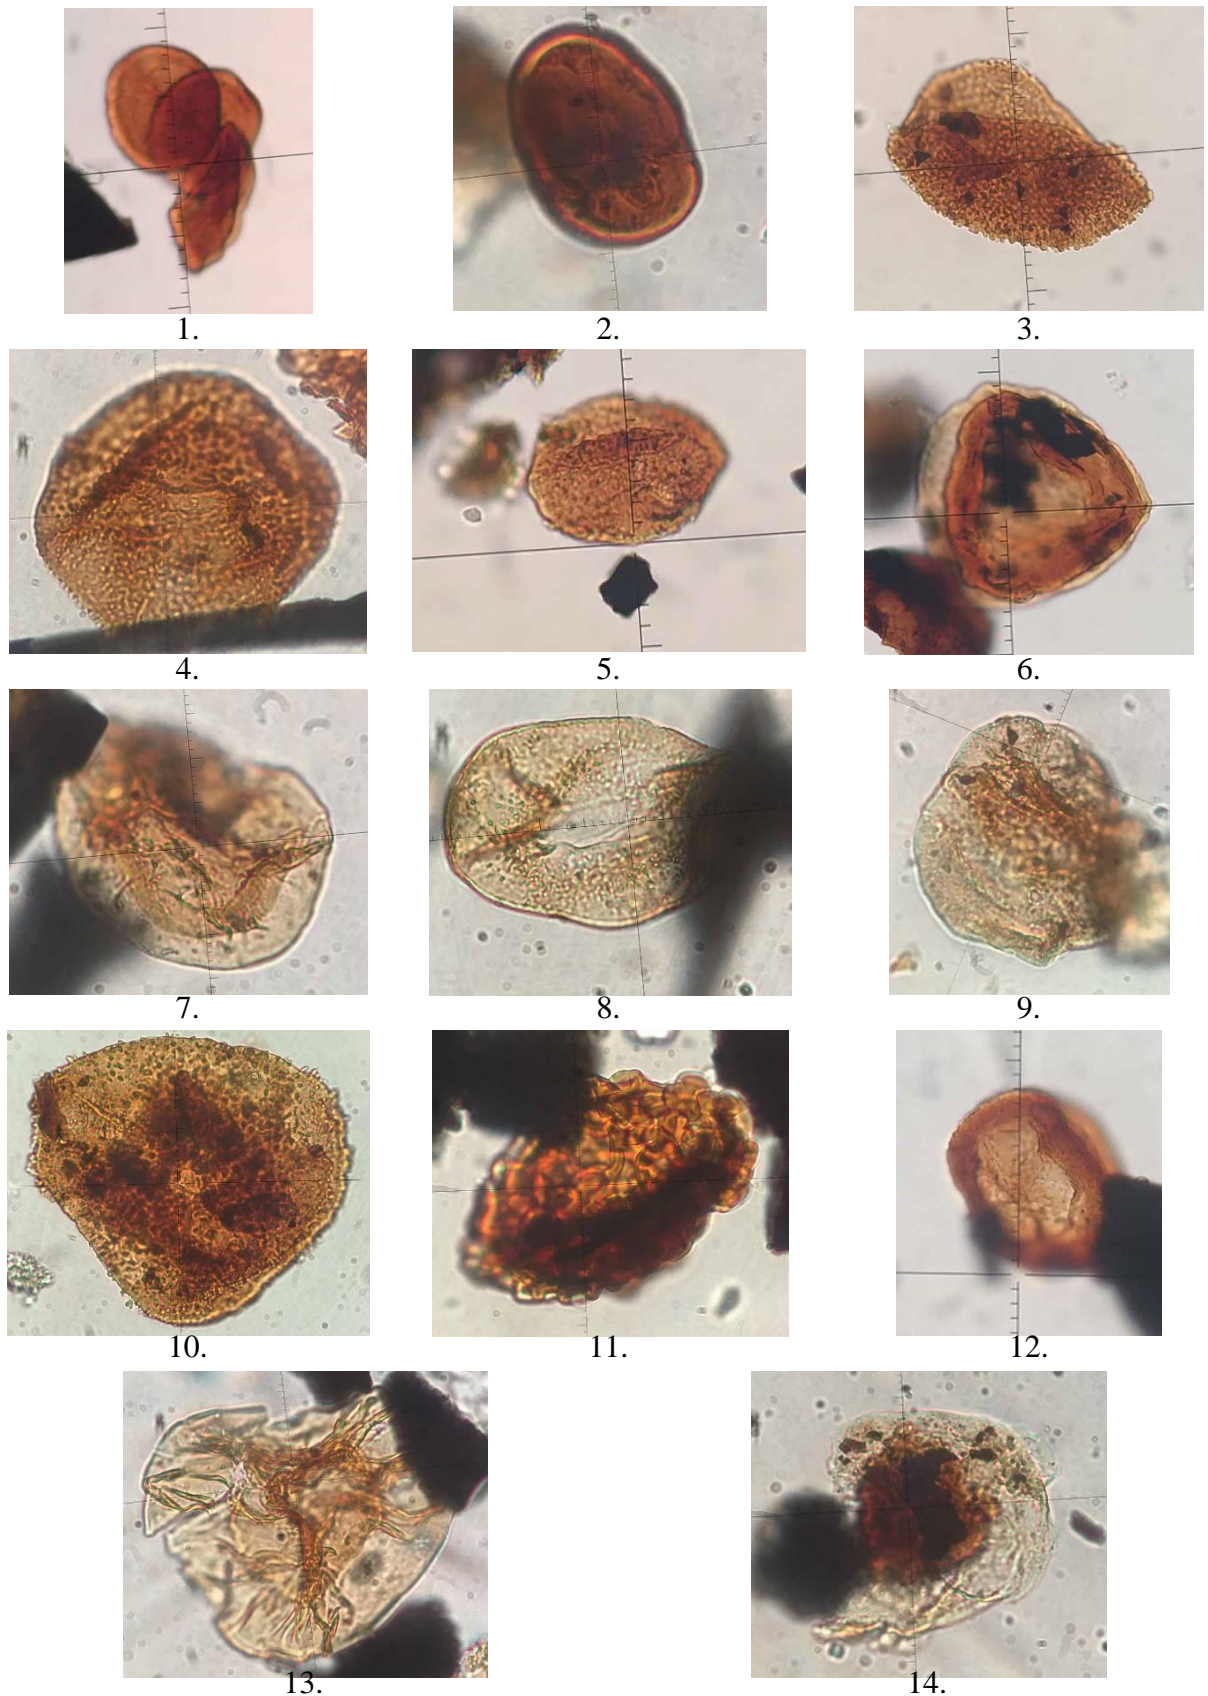

Table S1. *Punctatisporites orbicularis* Kos., 2. *Retusotriletes lemniscatus* (Lub.) Pashk., 3. *Schopfites colchesterensis* Kos., 4. *S. dimorphus* Kos., 5. *Foveolatisporites quaesitus* (Kos.) Bharad., 6. *Densosporites reynoldsburgensis* Kos., 7. *Remysporites magnificus* (Horst) Butt. et Will., 8. *Florinites antiquus* S., W. et B., 9. *Illinites elegans* Kos., 10. *Horriditriletes trichacanthus* (Lub.) Oshurk., 11. *Reticulatisporites contortoreticulatus* (Sadk.) Drjag., 12. *Crassispora echinata* Tet. et Shwartzs., 13. *Psilohymena psiloptera* (Lub.) Hart et Harr., 14. cf. *Guthoerlisporites rugosus* Inoss.

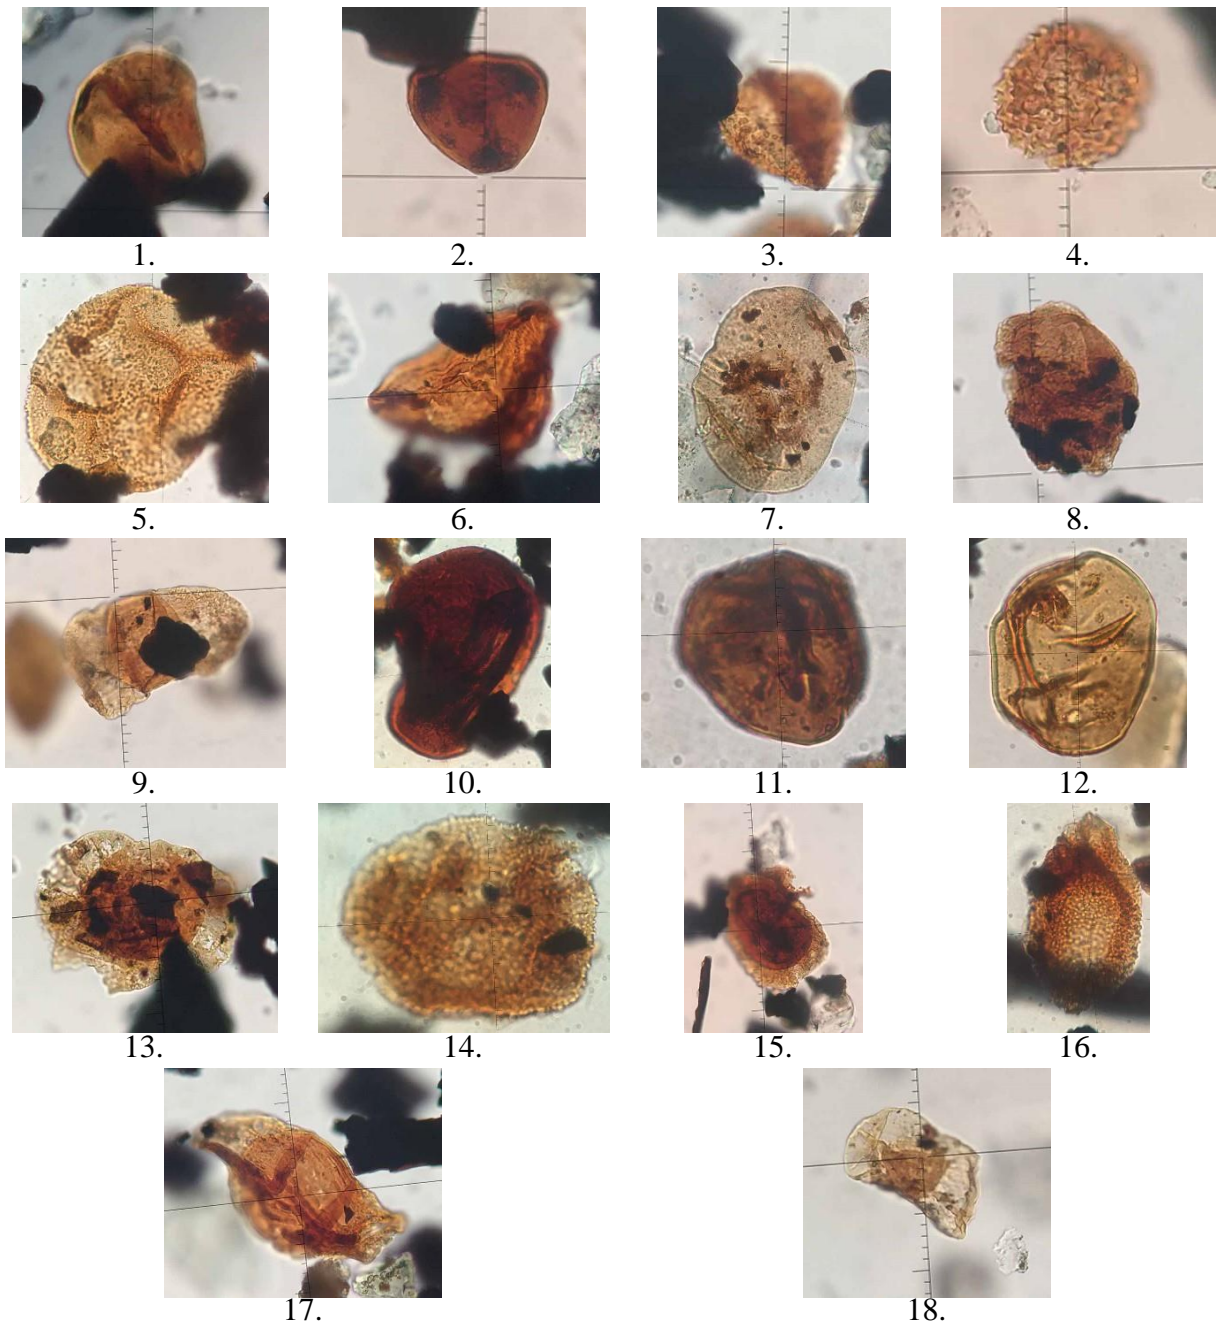

Table S2. 1. *Punctatisporites sublaevis* (Inoss.) Oshurk., 2. *Bifurcatisporites bifurcatus* (Kalibova) Inoss., 3. *Chanovejisorites confluens* (S.Arch. et Gam.) Oshurk., 4. *Spinosisporites hirsutus* Inoss., 5. *Cadiospora crypta* Turn., 6. *Callisporites cingulatus* (Alpern) Shwartz., 7. *Florinites pumicosus* (Ibr.) S., W. et B., 8. cf. *Bascanisporites* sp., 9. *Vestigisporites* sp., 10. *Punctatisporites* aff. *barakarensis* (Bharad. et Sriv.) Oshurk., 11. *P. labiosus* Virb., 12. *P. planus* Virb., 13. *Guthoerlisporites cancellosus* Playf. et Dett., 14. *Cordaitina rotata* (Lub.) Samoil., 15. *Bascanisporites* sp. aff. *undosus* Balme et Hennelly, 16. *Samoilovitchisaccites* cf. *turboreticulatus* (Samoil.) Dibn., 17. *Striatoabieites* sp. aff. *parvisaccus* (Efr.) Oshurk., 18. *Striatopodocarpites cancellatus* (B. et H.) Hart
